1           **Quantification of bacterial DNA in blood using droplet digital PCR: a pilot study**

2   Ana P. TEDIM, PhD<sup>1,2#</sup>; Irene MERINO, PhD<sup>3</sup>, Alicia ORTEGA, MLT<sup>1,2,4</sup>, Marta  
3   DOMÍNGUEZ-GIL, PhD<sup>3</sup>, José Maria EIROS, PhD<sup>3</sup>, Jesús F. BERMEJO-MARTÍN, PhD<sup>1,2,4</sup>

4   1. Group for Biomedical Research in Sepsis (BioSepsis). Instituto de Investigación Biomédica  
5   de Salamanca, (IBSAL), Paseo de San Vicente, 58-182, 37007 Salamanca, Spain.

6   2. Hospital Universitario Río Hortega, Calle Dulzaina, 2, 47012 Valladolid, Spain.

7   3. Microbiology Department, Hospital Universitario Río Hortega, Calle Dulzaina, 2, 47012  
8   Valladolid, Spain.

9   4. Centro de Investigación Biomédica en Red en Enfermedades Respiratorias (CiberES),  
10   CB22/06/00035, Instituto de Salud Carlos III, Av. de Monforte de Lemos, 3-5, 28029 Madrid,  
11   Spain.

12   **#Corresponding author:** Ana P. Tedim, Group for Biomedical Research in Sepsis (BioSepsis).  
13   Instituto de Investigación Biomédica de Salamanca, (IBSAL), Paseo de San Vicente, 58-182,  
14   37007 Salamanca, Spain, Phone number: +34622699611. E-mail address:  
15   [anspedrosa@gmail.com](mailto:anspedrosa@gmail.com)

16   **Running title:** ddPCR assays to quantify bacterial DNA.

17

18 **Abstract**

19 **Aim:** To use genus/species-specific genes droplet digital PCR (ddPCR) assays to  
20 detect/quantify bacterial DNA from *Escherichia coli*, *Klebsiella pneumoniae*, *Staphylococcus*  
21 *aureus* and *Enterococcus* spp in blood samples.

22 **Methods and Results:** Bacterial DNA from clinical strains ( $4 < n < 12$ ) was extracted, quantified  
23 and diluted ( $10^{-0.0001}$  ng/ $\mu$ L) and ddPCR assays were performed in triplicate. These ddPCR  
24 assays showed low replication variability, low detection limit ( $1-0.1$  pg/ $\mu$ L) and high  
25 genus/species specificity. ddPCR assays were also used to quantify bacterial DNA obtained  
26 from spiked blood ( $1 \times 10^4$ -1 CFU/mL) of each bacterial genus/species. Comparison between  
27 ddPCR assays and bacterial culture was performed by Pearson correlation. There was an almost  
28 perfect correlation ( $r \geq 0.997$ ,  $p \leq 0.001$ ) between the number of CFU/mL from bacterial culture  
29 and the number of gene copies/mL detected by ddPCR. The time from sample preparation to  
30 results was determined to be 3.5-4h.

31 **Conclusions:** The results demonstrated the quantification capacity and specificity of the ddPCR  
32 assays to detect/quantify four of the most important bloodstream infection (BSI) bacterial  
33 pathogens directly from blood.

34 **Significance and Impact:** This pilot study results reinforce the potential of ddPCR for the  
35 diagnosis and/or severity stratification of BSI. Applied to patients' blood samples it can  
36 improve diagnosis and diminish sample-to-results time, improving patient care.

37

38 **Key Words:** Bacterial DNA quantification; Bloodstream infections; Droplet digital PCR;  
39 ddPCR.

## 40 **Introduction**

41 Bloodstream infections (BSIs) caused by bacteria associated to sepsis are among the leading  
42 causes of mortality, particularly in critically ill patients <sup>1,2</sup>. The gold standard method for the  
43 microbiological diagnosis of BSIs is still blood culture, which is slow, cannot detect viruses,  
44 and only yields positive results in one-third of suspected BSIs and sepsis cases <sup>1,3,4</sup>.

45 Due to the high mortality of BSIs and sepsis, early administration of empiric broad-spectrum  
46 antimicrobials is normally the first step in the treatment of these infections, but in many  
47 occasions this it is not accurate for the actual bacterial pathogen causing BSI or sepsis, leading  
48 to therapeutic failure and death <sup>1-3,5</sup>. Therefore, it is imperative to identify, in a timely manner,  
49 the infectious agent causing BSI or infection leading to sepsis (bacteria, fungi, or virus) as well  
50 as possible associated antimicrobial resistances <sup>2,6</sup>, in order to administer tailored antimicrobial  
51 therapy. Thus, it is necessary to develop rapid, sensitive, and accurate molecular diagnostic  
52 methods to identify and quantify pathogens and their antimicrobial resistances directly in the  
53 blood <sup>2-4</sup>.

54 Furthermore, time to blood culture positivity has been suggested as a surrogate marker of blood  
55 bacterial load and associated with poor clinical outcome in BSIs <sup>7,8</sup>. Therefore, the early  
56 identification and quantification of bacterial DNA load in blood of patients with suspected BSIs  
57 or sepsis could help to assess illness severity and further guide patient's treatment <sup>2,6,9</sup>.

58 Droplet digital PCR (ddPCR) is a next-generation PCR method, with great precision and  
59 accuracy, that allows absolute quantification of target gene(s) without a standard curve and little  
60 interference from normal PCR inhibitors <sup>6</sup>. These characteristics make ddPCR an ideal method  
61 for the detection and quantification of pathogens directly from blood or other clinical samples <sup>2,6</sup>  
62 in patients with suspected BSI and sepsis. Nevertheless, very few studies have validated its  
63 performance to assist in BSI diagnosis <sup>6</sup>.

64 The aim of this work was to detect and quantify bacterial DNA from four of the most common  
65 BSIs pathogens (*Escherichia coli*, *Klebsiella pneumoniae*, *Staphylococcus aureus* and  
66 *Enterococcus* spp) directly from blood using genus/species specific genes ddPCR assays.

## 67 **Material and methods**

68 *Bacterial strains and DNA extraction.* Clinical strains, identified as belonging to the bacterial  
69 species of interest by VITEK® MS (Biomérieux, Marcy-l'Étoile, France), were recovered from  
70 de Microbiology Department of Hospital Universitario Río Hortega, Spain, from May 2019 and  
71 February 2020 (Table 1). No personal data from patients were recorded, and strains were  
72 anonymized on collection. Strains were plated on Columbia blood agar (Oxoid, Basingtoke,  
73 Hampshire, United Kingdom) and colonies picked and stored at -80°C. This article does not  
74 contain any studies with human or animal participants performed by any of the authors.

75 Strains were plated on Columbia blood agar (Oxoid, Basingtoke, Hampshire, United Kingdom)  
76 and genomic DNA from bacterial colonies was obtained using the Promega Wizard Genomic  
77 DNA Purification Kit (Promega, Madison WI, USA). DNA concentrations were measured with  
78 Nanodrop (Thermo Scientific, Waltham MA, USA). Serial dilutions were performed with  
79 RNase free water to obtain working bacterial DNA concentrations of 10, 1, 0.1, 0.01, 0.001 and  
80 0.0001 ng/μL.

81 *Description of ddPCR assays.* Primers and probes used for ddPCR assays are listed in Table 2.  
82 All primers and probes (Integrated DNA Technologies, Coralville IA, USA) have previously  
83 been used to detect *E. coli*, *K pneumoniae*, *S. aureus* and *Enterococcus* spp. with either real-  
84 time PCR or ddPCR<sup>10-12</sup>. Probes for Gram-negative bacteria (*E. coli*, and *K pneumoniae*) were  
85 labelled with HEX fluorophore and probes for Gram-positive bacteria (*S. aureus*, and  
86 *Enterococcus* spp.) were labelled with FAM fluorophore.

87 All the assays were performed using the QX200 Droplet Digital PCR system (Bio-Rad  
88 Laboratories Inc., Pleasanton, CA, USA) according to manufacturer instructions. Briefly,  
89 template DNA (2.5 $\mu$ L) was added to 18.5 $\mu$ L of mastermix containing ddPCR Supermix for  
90 probes no dUPTs (1x), forward and reverse primer (0.9 $\mu$ M each) and probe (0.25 $\mu$ M). This  
91 mastermix was placed into a QX200 droplet generator in order to generate droplets. The  
92 generated droplet emulsion was transferred to a new 96-well PCR plate and amplified in a  
93 C1000 Touch Thermal Cycler (Bio-Rad Laboratories Inc., Pleasanton, CA, USA). The  
94 amplification protocol was as follows: 95°C for 10 minutes, 40 cycles at 94°C for 30s and 56-  
95 62°C (gradient) for 1 minute, and a final cycle at 98°C for 10 minutes. After gene amplification,  
96 the plate was transferred to and read in a QX200 droplet reader (Bio-Rad Laboratories Inc.,  
97 Pleasanton, CA, USA).

98 In order to evaluate the performance of primers and probes in the detection of the above-  
99 mentioned bacterial species, developmental ddPCR assays were first performed as simplex  
100 ddPCR and then *E. coli* and *S. aureus* were tested as duplex ddPCR and *K. pneumoniae* and  
101 *Enterococcus* (*Enterococcus faecium* and *Enterococcus faecalis*), using one clinical strain. In  
102 the developmental assays different DNA concentrations (10, 1, 0.1, 0.01, 0.001 and 0.0001  
103 ng/ $\mu$ L) were tested in triplicate.

104 After determining the ideal concentration to use, further clinical strains (Table 1) were used to  
105 evaluate the precision of the test in detecting the target bacteria in the clinical setting and against  
106 related isolates. In order to evaluate primers specificity other bacteria similar to *E. coli* and *K.*  
107 *pneumoniae*, *S. aureus* and *Enterococcus* spp. were included (Table 1) in the assay.

108 *Spiked blood ddPCR assays.* One clinical strain for *E. coli*, *K. pneumoniae*, *S. aureus*, *E.*  
109 *faecium* and *E. faecalis* was inoculated in blood agar plate and incubated overnight at 37°C. One  
110 colony for each bacterial species was inoculated in thioglycolate broth (Biomérieux, Marcy-  
111 l'Étoile, France) and incubated overnight at 37°C. Each bacterial culture was serial dilute (1:10)

112 in saline 0.9% ( $1 \times 10^8$  to 1 CFU/mL), and 20 $\mu$ L were plated in duplicate in blood agar plates and  
113 incubated overnight at 37°C. Colonies were counted to calculate the CFU/mL of the initial  
114 thioglycolate broth culture. Blood was spiked with saline dilutions of  $1 \times 10^5$ ,  $1 \times 10^4$ ,  $1 \times 10^3$ ,  
115  $1 \times 10^2$  and 10 CFU/mL in order to obtain blood spiked with  $1 \times 10^4$ ,  $1 \times 10^3$ ,  $1 \times 10^2$ , 10 and 1  
116 CFU/mL. DNA was extracted from spiked blood ( $1 \times 10^4$  to 1 CFU/mL) using MoLYsis Basic5  
117 DNA extraction kit (Molzylm, Bremen, Germany) combined with QIAamp UCP Pathogen Mini  
118 Kit (Qiagen, Venlo, Netherlands) following manufacturer instructions. For ddPCR assays 2.5 $\mu$ L  
119 of each DNA extracted from spiked blood ( $1 \times 10^4$  to 1 CFU/mL) were tested in the previously  
120 described ddPCR duplex assays (see above). The number of copies of bacterial housekeeping  
121 genes present for each bacterial genome were calculated taking into account the number of  
122 copies each bacterial gene has in the species genome (Table 2). These experiments were  
123 performed in duplicate.

124 *Statistics.* Pearson correlation coefficient was used to compare the CFU/mL results obtained  
125 from bacterial cultures with the average of copy number/mL obtained from the two spiked  
126 blood experiments.

## 127 **Results**

128 The best annealing temperature for all the simplex assays was determined to be 58°C, by  
129 temperature gradient (56-62°C). In consequence, it was possible to run duplexed assays as  
130 described above, involving one Gram-Positive and one Gram-negative species each (*E. coli* + *S.*  
131 *aureus* and *K. pneumoniae* + *Enterococcus* spp.). These duplexed assays showed low replication  
132 variability and very low limit of detection, being able to detect DNA solutions with  
133 concentrations of 1pg/ $\mu$ L and in some cases 0.1pg/ $\mu$ L as we briefly described in Merino *et al* <sup>6</sup>.

134 The ddPCR assay employed to detect and quantify *E. coli* and *S. aureus* did not amplify any of  
135 the other non-*E. coli* Enterobacteriaceae or any other species from the genus *Staphylococcus*  
136 other than *S. aureus*. The same was true for the duplex assay for *K. pneumoniae* and

137 *Enterococcus* spp. In this case the ddPCR assay did not amplify other species from the genus  
138 *Klebsiella* or other non-*K. pneumoniae* Enterobacteriaceae and *Streptococcus agalactiae* (Table  
139 1).

140 The spiked blood experiments showed that there is an almost perfect correlation ( $0.997 \leq r \leq$   
141  $1.000$ ,  $p \leq 0.001$ ) between the number of CFU/mL of the bacterial culture and the number of gene  
142 copies/mL detected by ddPCR in each dilution tested (Figure 1). For almost all bacterial species  
143 tested ddPCR presented gene copies/mL in the same order of magnitude as bacterial culture  
144 results (CFU/mL). The results also indicate that the ddPCR assays used in this study have a  
145 limit of detection of 1-10 CFU/mL. In this study we determined that time from sample  
146 preparation to results was approximately 3.5h to 4h, significantly reducing the time to get  
147 actionable information (bacterial identification) compared to the gold standard blood culture  
148 technique (24h-48h).

## 149 **Discussion**

150 ddPCR demonstrated a very high sensitivity and specificity in this study. Regarding sensitivity,  
151 ddPCR assays showed a detection limit of 1-10 CFU/mL, similar to the few studies that have  
152 used other ddPCR assays<sup>2,13,14</sup> to detect DNA from bacterial pathogens in blood. This high  
153 sensitivity, make ddPCR assays ideal for detection and quantification of pathogens in sites  
154 where their initial load might be very small as BSIs and associated sepsis<sup>6,15</sup>. Furthermore, this  
155 is the first study where a correlation has been performed between the number of CFU/mL  
156 obtained from spiked blood and copies gene/mL obtained from ddPCR. The almost perfect  
157 correlation we found between both quantification strategies indicates that we can approximate  
158 the number of bacteria present in patients' blood.

159 Furthermore, the fact that the ddPCR assays tested in this study only amplified the intended  
160 bacterial species, indicates great specificity of these assays for each of the genera/species tested,  
161 confirming the results obtained in previous studies using the same primers/probes set<sup>10-12</sup>. One

162 of the main advantages of the described ddPCR assays over blood culture (gold-standard)  
163 diagnostic method is the time from sample to results we reported (3.5-4h *versus* 24-48h,  
164 respectively). The reported time of sample to results reported here is similar to that reported by  
165 other pilot studies using ddPCR assays to detect BSIs <sup>2,13</sup>. The high specificity demonstrated by  
166 the ddPCR assays and the possibility to inform results in a timely manner to clinicians are  
167 important as it gives the analyst confidence to report the results obtained by this technique and  
168 in doing so helping clinicians to improve patients' treatment.

169 Even though these assays were designed to detect the *E. coli*, *K. pneumoniae*, *S. aureus* and  
170 *Enterococcus* spp in blood they demonstrate the high performance of ddPCR, suggesting that  
171 this technology might be used for other applications (Figure 2), as: i) diagnostic of any type of  
172 infection <sup>6</sup>, particularly those cases with low bacterial loads or difficult access to infection site  
173 (e.g. tuberculosis, meningitis or endocarditis), or in the case of sepsis where the positivity rate  
174 of current diagnostic techniques is low; ii) detection and quantification of antimicrobial genes or  
175 point mutations leading to antimicrobial resistance, allowing the reduction of the time from  
176 sample collection to results from at least 24-48h to a few hours, helping to guide and improve  
177 patients' treatment <sup>2,13,14</sup>; iii) severity stratification of the disease: high DNA loads have been  
178 associated to faster disease progression and greater mortality in patients with BSI <sup>9,16</sup>; iv)  
179 distinguish between colonization and infection: quantifying bacterial DNA load might help to  
180 determine whether a certain opportunistic pathogen might be just colonizing a given site or if it  
181 is causing an infection instead (e.g. intestinal infections and lung infections); v) and finally,  
182 detection and quantification of the transcriptome of bacterial toxins: the detection and  
183 quantification of mRNA of *E. coli*, *Shigella* and *Clostridioides difficile* toxins might help with  
184 the diagnosis of infections by these bacterial species and also to assess disease severity,  
185 prognosis and guide treatment. Further studies specifically designed to test the performance of  
186 ddPCR to identify and quantify bacterial genomes directly from blood samples of patients with  
187 confirmed or suspected BSI are warranted.



188 In this study we demonstrated that ddPCR assays to detect DNA from *E. coli*, *K. pneumoniae*, *S.*  
189 *aureus* and *Enterococcus* spp show a very low limit of detection, high sensitivity and specificity  
190 and can be used to identify and quantify DNA from these four bacterial genus/species directly  
191 from blood samples without the need of an intermediate step of bacterial culture. This pilot  
192 study reinforces the potential of ddPCR for the diagnosis and severity stratification of BSI and  
193 sepsis.

194 **Funding:** This work was funded by Instituto de Salud Carlos III (ISCIII), (project code  
195 PI19/00590), co-funded by European Unión (JFBM), and also by a Research Grant 2020 from  
196 ESCMID - APT. APT salaries were funded by the Sara Borrell Research Grant (CD18/00123)  
197 from ISCIII and co-funded by European Social Found (ESF).

#### 198 **Author contributions:**

199 **Ana P. Tedim:** Conceptualization; Methodology; Investigation; Formal analysis; Validation;  
200 Writing – Original draft; Funding acquisition. **Irene Merino:** Methodology; Investigation;  
201 Resources; Writing – review & editing. **Alicia Ortega:** Investigation; Resources; Project  
202 administration. **Marta Domínguez-Gil:** Resources. **José María Eiros:** Resources; Writing –  
203 review & editing. **Jesús F. Bermejo-Martín:** Conceptualization; Investigation; Formal  
204 analysis; Writing – review & editing; Supervision; Funding acquisition. All authors read and  
205 approved the final manuscript.

#### 206 **Statements and Declarations**

207 *Data availability statement:* Data will be made available at a reasonable request.

208 *Conflict of interest:* The authors declare that they have no conflict of interest regarding this  
209 submission.

## 210 **References**

- 211 1. Timsit JF, Ruppé E, Barbier F, Tabah A, Bassetti M. Bloodstream infections in critically ill  
212 patients: an expert statement. *Intensive Care Med* 2020; **46**: 266–84.
- 213 2. Wu J, Tang B, Qiu Y, *et al.* Clinical validation of a multiplex droplet digital PCR for  
214 diagnosing suspected bloodstream infections in ICU practice: a promising diagnostic tool.  
215 *Crit Care* 2022; **26**: 243.
- 216 3. Martinez RM, Wolk DM. Bloodstream Infections. *Microbiol Spectr* 2016; **4**.
- 217 4. Kalantar KL, Neyton L, Abdelghany M, *et al.* Integrated host-microbe plasma  
218 metagenomics for sepsis diagnosis in a prospective cohort of critically ill adults. *Nat*  
219 *Microbiol* 2022; **7**: 1805–16. Available at: <https://pubmed.ncbi.nlm.nih.gov/36266337/>.  
220 Accessed January 10, 2023.
- 221 5. Kern W V, Rieg S. Burden of bacterial bloodstream infection-a brief update on  
222 epidemiology and significance of multidrug-resistant pathogens. *Clin Microbiol Infect*  
223 2020; **26**: 151–7.
- 224 6. Merino I, de la Fuente A, Domínguez-Gil M, Eiros JM, Tedim AP, Bermejo-Martín JF.  
225 Digital PCR applications for the diagnosis and management of infection in critical care  
226 medicine. *Crit Care* 2022; **26**: 63. Available at:  
227 <http://www.ncbi.nlm.nih.gov/pubmed/35313934>.
- 228 7. Khatib R, Riederer K, Saeed S, *et al.* Time to positivity in Staphylococcus aureus  
229 bacteremia: possible correlation with the source and outcome of infection. *Clin Infect Dis*  
230 2005; **41**: 594–8.
- 231 8. Kim J, Gregson DB, Ross T, Laupland KB. Time to blood culture positivity in  
232 Staphylococcus aureus bacteremia: association with 30-day mortality. *J Infect* 2010; **61**:  
233 197–204.
- 234 9. Ziegler I, Cajander S, Rasmussen G, Ennefors T, Mölling P, Strålin K. High nuc DNA load  
235 in whole blood is associated with sepsis, mortality and immune dysregulation in  
236 Staphylococcus aureus bacteraemia. *Infect Dis (Lond)* 2019; **51**: 216–26.
- 237 10. Weiss D, Gawlik D, Hotzel H, *et al.* Fast, economic and simultaneous identification of  
238 clinically relevant Gram-negative species with multiplex real-time PCR. *Future Microbiol*  
239 2019; **14**: 23–32.
- 240 11. Nijhuis RHT, van Maarseveen NM, van Hannen EJ, van Zwet AA, Mascini EM. A rapid  
241 and high-throughput screening approach for methicillin-resistant Staphylococcus aureus  
242 based on the combination of two different real-time PCR assays. *J Clin Microbiol* 2014;  
243 **52**: 2861–7.
- 244 12. Cao Y, Raith MR, Griffith JF. Droplet digital PCR for simultaneous quantification of  
245 general and human-associated fecal indicators for water quality assessment. *Water Res*  
246 2015; **70**: 337–49.

- 247 13. Shin J, Shin S, Jung SH, *et al.* Duplex dPCR System for Rapid Identification of Gram-  
248 Negative Pathogens in the Blood of Patients with Bloodstream Infection: A Culture-  
249 Independent Approach. *J Microbiol Biotechnol* 2021; **31**: 1481–9.
- 250 14. Zheng Y, Jin J, Shao Z, *et al.* Development and clinical validation of a droplet digital  
251 PCR assay for detecting *Acinetobacter baumannii* and *Klebsiella pneumoniae* in patients  
252 with suspected bloodstream infections. *Microbiologyopen* 2021; **10**.
- 253 15. Wang M, Yang J, Gai Z, *et al.* Comparison between digital PCR and real-time PCR in  
254 detection of *Salmonella typhimurium* in milk. *Int J Food Microbiol* 2018; **266**: 251–6.
- 255 16. Ziegler I, Lindström S, Källgren M, Strålin K, Mölling P. 16S rDNA droplet digital PCR  
256 for monitoring bacterial DNAemia in bloodstream infections. *PLoS One* 2019; **14**.

257

## 258 Tables

259 **Table 1. Bacterial species and number of clinical strains used in the study**

| <b>Species</b>                      | <b>No of clinical strains</b> |
|-------------------------------------|-------------------------------|
| <i>Escherichia coli</i>             | <b>10</b>                     |
| <i>Klebsiella pneumoniae</i>        | <b>12</b>                     |
| <i>Citrobacter braakii</i>          | 1                             |
| <i>Enterobacter cloacae</i>         | 1                             |
| <i>Klebsiella oxytoca</i>           | 3                             |
| <i>Morganella morganii</i>          | 3                             |
| <i>Proteus mirabilis</i>            | 3                             |
| <b><i>Staphylococcus aureus</i></b> | <b>10</b>                     |
| <i>Staphylococcus constellatus</i>  | 1                             |
| <i>Staphylococcus epidermidis</i>   | 4                             |
| <i>Staphylococcus haemolyticus</i>  | 2                             |
| <i>Staphylococcus hominis</i>       | 2                             |
| <i>Staphylococcus simulans</i>      | 2                             |
| <i>Staphylococcus saprophyticus</i> | 1                             |
| <b><i>Enterococcus faecalis</i></b> | <b>6</b>                      |
| <b><i>Enterococcus faecium</i></b>  | <b>4</b>                      |
| <i>Streptococcus agalactiae</i>     | 8                             |

260

261 **Table 2. Primers and Probes used in the study**

| Bacterial Genus or Species | Gene or region amplified | Copies of the gene of the genome | Primers and Probe name | Sequence (5'-3')                             | Concentration (μM) | Amplicon size (bp) | ddCPR conditions                                                        | Reference |
|----------------------------|--------------------------|----------------------------------|------------------------|----------------------------------------------|--------------------|--------------------|-------------------------------------------------------------------------|-----------|
| <i>E. coli</i>             | <i>gad</i>               | 2                                | gad-FW                 | GGATATCGTCTGGGACTTCCG                        | 0.9                | 77                 | 95°C for 10min, 40 cycles<br>94°C for 30s and 58°C for 1min, 98°C 10min | 10        |
|                            |                          |                                  | gad-RV                 | GCGGAGCCAGACCGAATT                           | 0.9                |                    |                                                                         |           |
|                            |                          |                                  | gad-TMP                | HEX-GTGAAATCGATCAGTGCTTCAGGCCA-ZEN/IBFQ      | 0.25               |                    |                                                                         |           |
| <i>K. pneumoniae</i>       | <i>khe</i>               | 1                                | khe-FW                 | TGGGGATCCACCACGA                             | 0.9                | 126                | 95°C for 10min, 40 cycles<br>94°C for 30s and 58°C for 1min, 98°C 10min | 10        |
|                            |                          |                                  | khe-RV                 | AGAGATAGCCGTTTATCCACAC                       | 0.9                |                    |                                                                         |           |
|                            |                          |                                  | khe-TMP                | HEX-GAGGAAGAGTTCATCTACGTGCTGGAGG-ZEN/IBFQ    | 0.25               |                    |                                                                         |           |
| <i>S. aureus</i>           | SA442                    | 1                                | SA442-F                | CAATCTTTGYCGGTACACGATATTCT                   | 0.9                | 112                | 95°C for 10min, 40 cycles<br>94°C for 30s and 658 for 1min, 98°C 10min  | 11        |
|                            |                          |                                  | SA442-R                | CAACGTAATGAGATTTTCAGTAGATAATACAAC            | 0.9                |                    |                                                                         |           |
|                            |                          |                                  | SA442-P                | FAM-CACGACTAAATARACGCTCATTTCGRATTTT-ZEN/IBFQ | 0.25               |                    |                                                                         |           |
| <i>Enterococcus spp</i>    | 23S rDNA                 | 6 ( <i>E. faecium</i> )          | EnteroF1A              | GAGAAATCCAAACGAACTTG                         | 0.9                | 93                 | 95°C for 10min, 40 cycles<br>94°C for 30s and 58°C for 1min, 98°C 10min | 12        |
|                            |                          |                                  | EnteroR1               | CAGTGCTCTACCTCCATCATT                        | 0.9                |                    |                                                                         |           |
|                            |                          | 4 ( <i>E. faecalis</i> )         | GPL813TQ               | FAM-TGGTTCTCTCCGAAATAGCTTTAGGGCTA-ZEN/IBFQ   | 0.25               |                    |                                                                         |           |

262

263 **Figure legends**

264 **Figure 1. Correlation between the number of CFU/mL of the bacterial culture and the**  
265 **number of gene copies/mL detected by ddPCR.** A) ddPCR assay to detect and quantify *E.*  
266 *coli* and *S. aureus*. B) ddPCR assay to detect and quantify *K. pneumoniae* and *Enterococcus*  
267 spp.

268 **Figure 2. Possible applications of ddPCR for bacterial, viral and fungal infections**  
269 **diagnosis.**

270

**A)**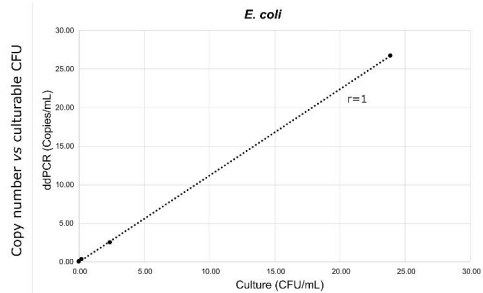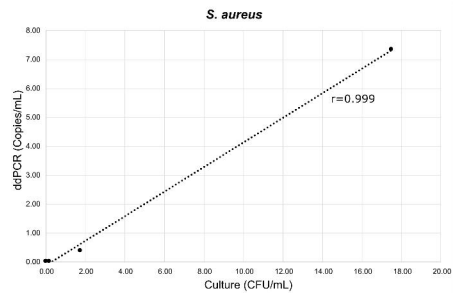**B)**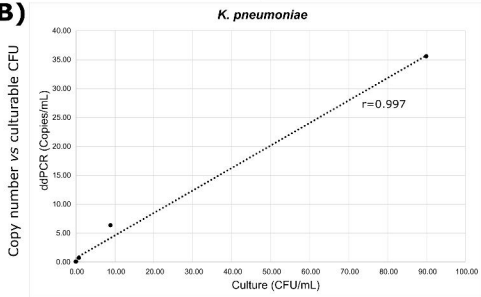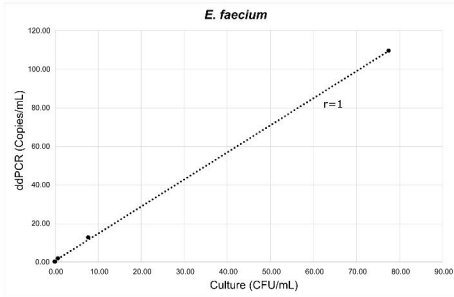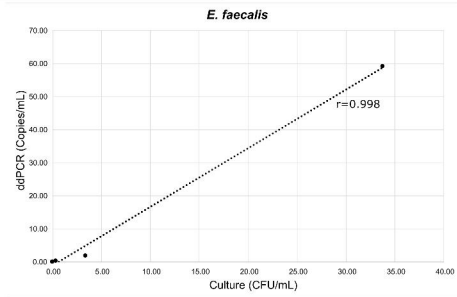

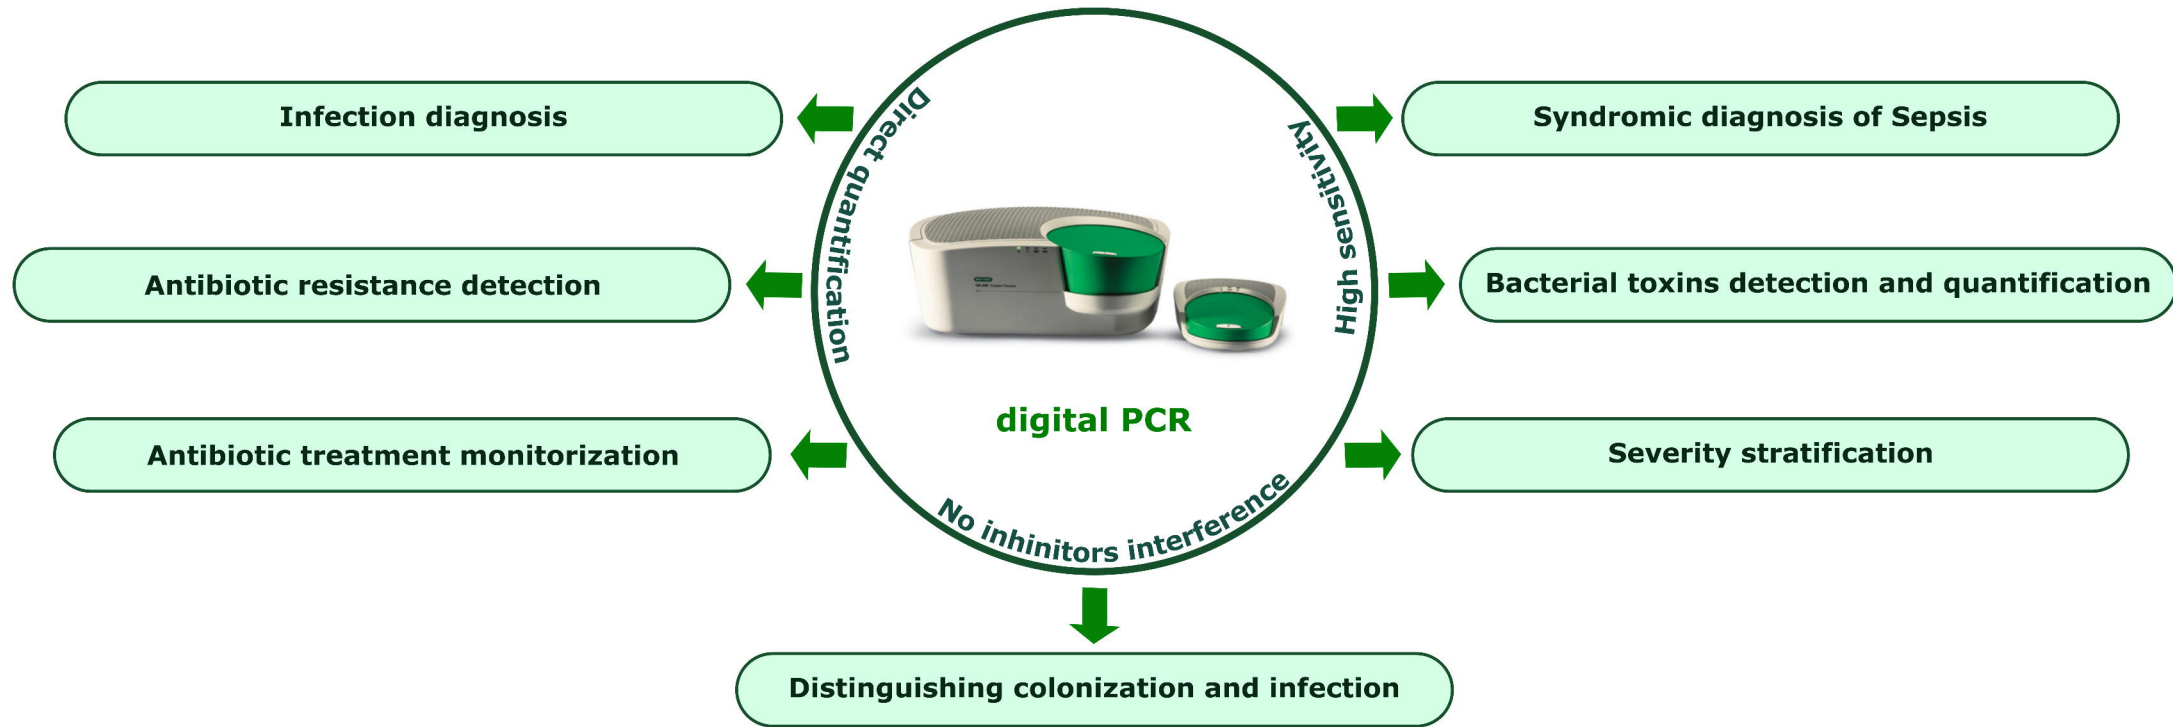

Source: https://www.biorxiv.org/content/10.1101/2022.12.02.518639v2.full.pdf
